# Supplementary material for: Dual Förster resonance energy transfer and morphology control to boost the power conversion efficiency of all-polymer OPVs
Source: Royal Society of Chemistry journal article supplement (doi:10.1039/c7ra00244k), 2017-01-01
Supplement: c7ra00244k1.pdf [file c7ra00244k1.pdf]

*Supporting Information*

**Dual Förster Resonance Energy Transfer and Morphology Control  
to Boost the Power Conversion Efficiency of All-Polymer OPVs**

Jiangang Liu, Bin Tang, Qiuju Liang, Yanchun Han\*, Zhiyuan Xie and Jun Liu

State Key Laboratory of Polymer Physics and Chemistry, Changchun Institute of Applied Chemistry, Chinese Academy of Sciences, 5625 Renmin Street, Changchun 130022, P. R. China

\* To whom correspondence should be addressed, E-mail: [ychan@ciac.jl.cn](mailto:ychan@ciac.jl.cn)

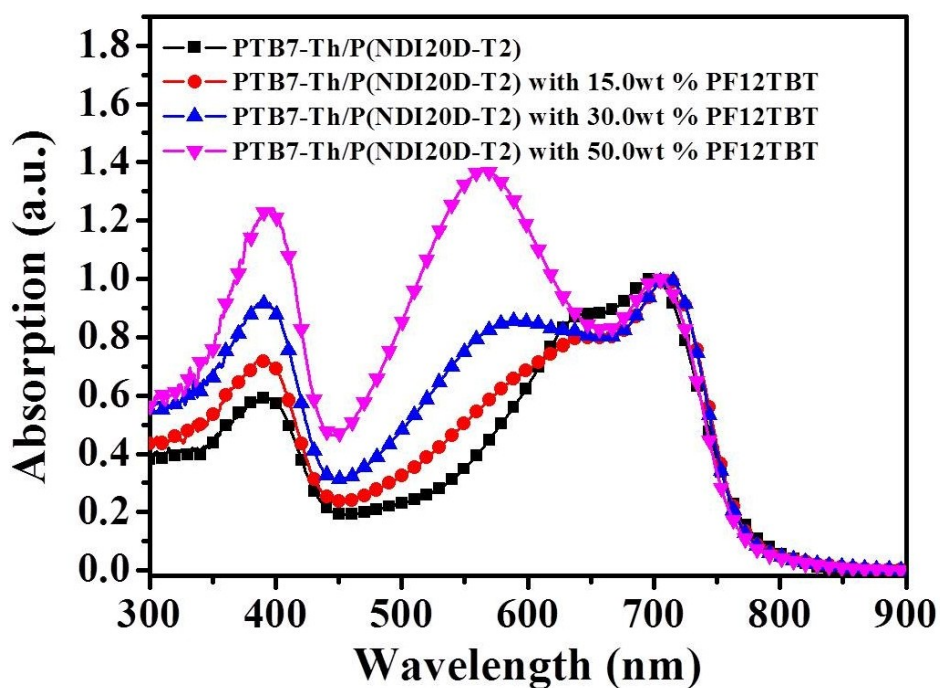

Figure S1. UV - vis absorption spectra of PTB7-Th/P(NDI20D-T2) and PTB7-Th/P(NDI20D-T2) with different contents of PF12TBT.

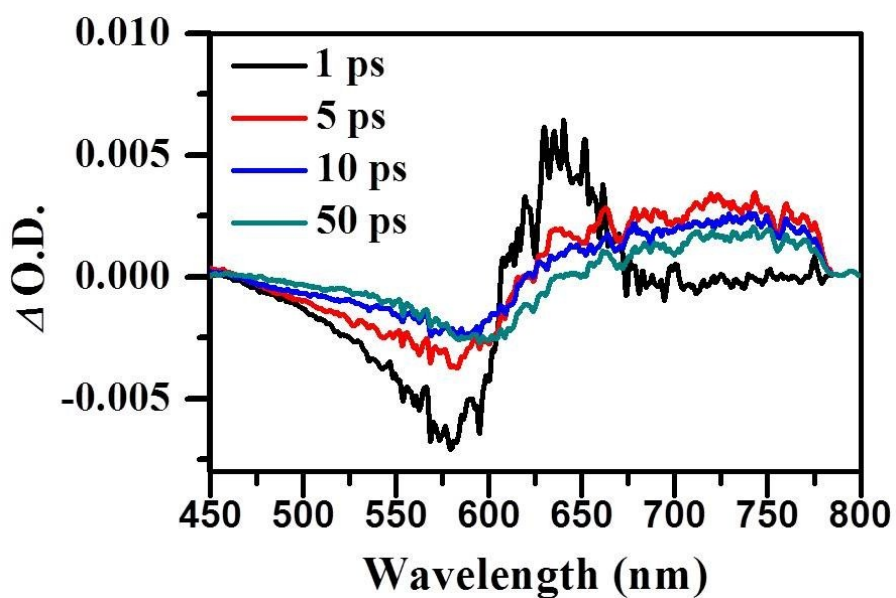

Figure S2. Transient spectra of PF12TBT film in 1, 5, 10, 50 ps after time zero.

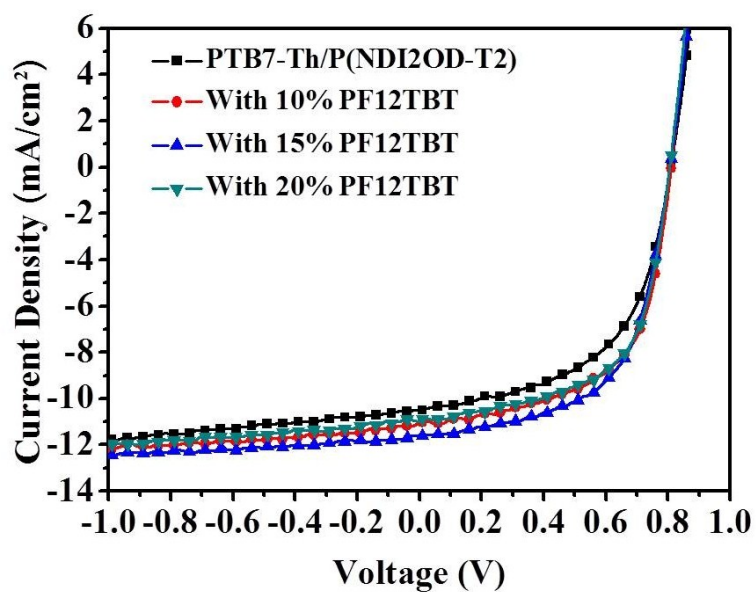

Figure S3. Photocurrent-voltage curves of photovoltaic devices for binary blend system and ternary blend systems with different content of PF12TBT.

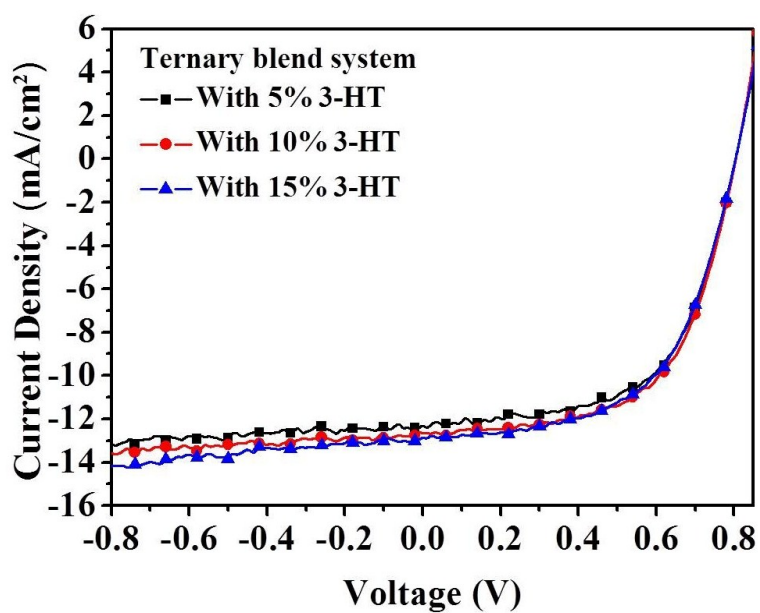

Figure S4. Photocurrent-voltage curves of photovoltaic devices for ternary blend system with different content of 3-HT.

|                                       | $\tau_1$ (ns) | <i>Std.</i> (%) | $\tau_2$ (ns) | <i>Std.</i> (%) | $\tau$ (ns) |
|---------------------------------------|---------------|-----------------|---------------|-----------------|-------------|
| <b>PF12TBT</b>                        | 1.73          | 91.17           | 6.56          | 8.83            | 2.15        |
| <b>PF12TBT/PTB7-Th</b>                | 0.64          | 92.80           | 5.25          | 7.20            | 0.97        |
| <b>PF12TBT/P(NDI2OD-T2)</b>           | 1.03          | 92.14           | 5.32          | 7.86            | 1.36        |
| <b>PF12TBT/PTB7-Th with 3-HT</b>      | 0.61          | 93.61           | 4.93          | 6.39            | 0.88        |
| <b>PF12TBT/P(NDI2OD-T2) with 3-HT</b> | 0.97          | 93.41           | 5.16          | 6.59            | 1.24        |

Table S1. Double exponential fitting data of PF12TBT film, PF12TBT/PTB7-Th blend film, PF12TBT/P(NDI2OD-T2) blend film and the corresponding films with 3-HT.

| <b>Device</b>      | <b><math>V_{oc}</math> (V)</b> | <b><math>J_{sc}</math> (mA/cm<sup>2</sup>)</b> | <b><i>FF</i></b> | <b>PCE (%)</b> |
|--------------------|--------------------------------|------------------------------------------------|------------------|----------------|
| <b>Binary</b>      | 0.81                           | 10.53                                          | 0.56             | 4.78           |
| <b>10% PF12TBT</b> | 0.80                           | 11.08                                          | 0.59             | 5.23           |
| <b>15% PF12TBT</b> | 0.81                           | 11.63                                          | 0.61             | 5.75           |
| <b>20% PF12TBT</b> | 0.81                           | 10.98                                          | 0.61             | 5.43           |

Table S2. The values are the photovoltaic parameters of binary blend system and ternary blend systems with different content of PF12TBT.

| <b>Device</b>   | <b><math>V_{oc}</math> (V)</b> | <b><math>J_{sc}</math> (mA/cm<sup>2</sup>)</b> | <b><i>FF</i></b> | <b>PCE (%)</b> |
|-----------------|--------------------------------|------------------------------------------------|------------------|----------------|
| <b>5% 3-HT</b>  | 0.81                           | 12.13                                          | 0.61             | 5.99           |
| <b>10% 3-HT</b> | 0.81                           | 12.66                                          | 0.59             | 6.05           |
| <b>15% 3-HT</b> | 0.81                           | 12.81                                          | 0.58             | 6.01           |

Table S3. The values are the photovoltaic parameters of ternary blend system with different content of 3-HT.
